# Supplementary material for: Association of Primary Treatment Modality for Advanced-Stage Oropharyngeal Squamous Cell Carcinoma With Survival Outcomes
Source: PubMed Central journal article supplement (PMC8170546; doi:10.1001/jamanetworkopen.2021.12067), 2021-06-01

## Supplemental Online Content

Tsai MH, Cheng YJ, Pao TH, Hsueh WT, Chen HHW, Wu YH. Association of primary treatment modality for advanced-stage oropharyngeal squamous cell carcinoma with survival outcomes. *JAMA Netw Open*. 2021;4(6):e2112067. doi:10.1001/jamanetworkopen.2021.12067

**eTable 1.** Univariable and Multivariable Cox Proportional Hazards Model for Progression-Free Survival (n = 922)

**eTable 2.** Patient and Tumor Characteristics of the Propensity-Matched Group (n = 972)

**eTable 3.** Univariable and Multivariable Cox Proportional Hazards Model for Overall Survival in the Propensity-Matched Group (n = 972)

**eFigure.** Landmark Analysis Restricted to Patients Who Survived for More Than 12, More Than 18, and More Than 24 Months

This supplemental material has been provided by the authors to give readers additional information about their work.

**eTable 1.** Univariable and Multivariable Cox Proportional Hazards Model for Progression-Free Survival (n = 922)

|                                     | Univariable           |         | Multivariable         |         |
|-------------------------------------|-----------------------|---------|-----------------------|---------|
| Variable                            | Hazard ratio (95% CI) | p-value | Hazard ratio (95% CI) | p-value |
| <b>Sex</b>                          |                       |         |                       |         |
| Male                                | Reference             |         | Reference             |         |
| Female                              | 0.30 (0.11-0.81)      | 0.02    | 0.43 (0.15-1.21)      | 0.11    |
| <b>Subsite</b>                      |                       |         |                       |         |
| Tonsil                              | Reference             |         | Reference             |         |
| Base of tongue                      | 2.29 (1.46-3.60)      | <0.001  | 2.27 (1.39-3.71)      | 0.001   |
| Oropharynx, NOS                     | 2.88 (1.67-4.96)      | <0.001  | 3.26 (1.82-5.84)      | <0.001  |
| <b>Histological grade</b>           |                       |         |                       |         |
| Well-differentiated (Grade 1)       | 1.68 (0.72-3.90)      | 0.23    | 1.25 (0.52-2.98)      | 0.62    |
| Moderately differentiated (Grade 2) | Reference             |         | Reference             |         |
| Poorly differentiated (Grade 3-4)   | 0.69 (0.43-1.13)      | 0.14    | 0.87 (0.53-2.98)      | 0.60    |
| Unknown                             | 0.53 (0.27-1.05)      | 0.07    | 0.58 (0.29-1.16)      | 0.12    |
| <b>Clinical T classification</b>    |                       |         |                       |         |
| T1                                  | Reference             |         | Reference             |         |
| T2                                  | 1.25 (0.63-2.47)      | 0.52    | 1.28 (0.64-2.56)      | 0.48    |
| T3                                  | 1.63 (0.78-3.43)      | 0.20    | 1.67 (0.76-3.67)      | 0.20    |
| T4a                                 | 2.29 (1.15-4.57)      | 0.02    | 1.63 (0.78-3.39)      | 0.19    |
| <b>Clinical N classification</b>    |                       |         |                       |         |
| N0                                  | Reference             |         | Reference             |         |
| N1                                  | 1.26 (0.42-3.81)      | 0.68    | 1.85 (0.59-5.80)      | 0.29    |
| N2                                  | 1.98 (0.72-5.41)      | 0.18    | 3.49 (1.23-9.86)      | 0.02    |
| <b>Primary Treatment Modality</b>   |                       |         |                       |         |
| CCRT                                | Reference             |         | Reference             |         |
| Surgery                             | 1.64 (1.09-2.46)      | 0.02    | 1.72 (1.12-2.66)      | 0.01    |

Abbreviations: CI, confidence interval; NOS, not otherwise specified; CCRT, concurrent chemoradiotherapy

**eTable 2.** Patient and Tumor Characteristics of the Propensity-Matched Group (n = 972)

| <b>Primary Treatment Modality</b>   | <b>Chemoradiotherapy<br/>(n = 486)</b> | <b>Surgery<br/>(n = 486)</b> | <b>p-value</b> |
|-------------------------------------|----------------------------------------|------------------------------|----------------|
| Sex, n (%)                          |                                        |                              | 0.61           |
| Male                                | 434 (89.3)                             | 428 (88.1)                   |                |
| Female                              | 52 (10.7)                              | 58 (11.9)                    |                |
| Age, mean (SD), years               | 53.59 (9.11)                           | 53.49 (9.78)                 | 0.27           |
| Subsite, n (%)                      |                                        |                              |                |
| Tonsil                              | 295 (60.7)                             | 318 (65.4)                   |                |
| Base of tongue                      | 137 (28.2)                             | 116 (23.9)                   |                |
| Oropharynx, NOS                     | 54 (11.1)                              | 52 (10.7)                    |                |
| Histological grade                  |                                        |                              | 0.47           |
| Well-differentiated (Grade 1)       | 18 (3.7)                               | 25 (5.1)                     |                |
| Moderately differentiated (Grade 2) | 291 (59.9)                             | 277 (57.0)                   |                |
| Poorly differentiated (Grade 3-4)   | 137 (28.2)                             | 150 (30.9)                   |                |
| Unknown                             | 40 (8.2)                               | 34 (7.0)                     |                |
| Clinical T classification           |                                        |                              | 0.001          |
| T1                                  | 65 (13.4)                              | 106 (21.8)                   |                |
| T2                                  | 197 (40.5)                             | 206 (42.4)                   |                |
| T3                                  | 79 (16.3)                              | 63 (13.0)                    |                |
| T4a                                 | 145 (29.8)                             | 111 (22.8)                   |                |
| Clinical N classification           |                                        |                              | 0.36           |
| N0                                  | 36 ( 7.4)                              | 33 ( 6.8)                    |                |
| N1                                  | 94 (19.3)                              | 112 (23.0)                   |                |
| N2                                  | 356 (73.3)                             | 341 (70.2)                   |                |

Abbreviations: SD, standard deviation; NOS, not otherwise specified

**eTable 3.** Univariable and Multivariable Cox Proportional Hazards Model for Overall Survival in the Propensity-Matched Group (n = 972)

|                                     | Univariable           |         | Multivariable         |         |
|-------------------------------------|-----------------------|---------|-----------------------|---------|
| Variable                            | Hazard ratio (95% CI) | p-value | Hazard ratio (95% CI) | p-value |
| Sex                                 |                       |         |                       |         |
| Male                                | Reference             |         | Reference             |         |
| Female                              | 0.16 (0.09-0.29)      | <0.001  | 0.22 (0.12-0.39)      | <0.001  |
| Subsite                             |                       |         |                       |         |
| Tonsil                              | Reference             |         | Reference             |         |
| Base of tongue                      | 2.04 (1.66-2.51)      | <0.001  | 1.52 (1.21-1.91)      | <0.001  |
| Oropharynx, NOS                     | 1.97 (1.50-2.61)      | <0.001  | 1.54 (1.15-2.06)      | 0.004   |
| Histological grade                  |                       |         |                       |         |
| Well-differentiated (Grade 1)       | 1.25 (0.83-1.88)      | 0.29    | 0.97 (0.64-1.47)      | 0.88    |
| Moderately differentiated (Grade 2) | Reference             |         | Reference             |         |
| Poorly differentiated (Grade 3-4)   | 0.60 (0.48-0.76)      | <0.001  | 0.73 (0.57-0.93)      | 0.01    |
| Unknown                             | 0.96 (0.68-1.36)      | 0.84    | 1.01 (0.71-1.44)      | 0.95    |
| Clinical T classification           |                       |         |                       |         |
| T1                                  | Reference             |         | Reference             |         |
| T2                                  | 1.35 (0.99-1.84)      | 0.06    | 1.29 (0.94-1.76)      | 0.12    |
| T3                                  | 1.88 (1.32-2.70)      | <0.001  | 1.61 (1.10-2.35)      | 0.02    |
| T4a                                 | 2.83 (2.07-3.86)      | <0.001  | 2.04 (1.46-2.85)      | <0.001  |
| Clinical N classification           |                       |         |                       |         |
| N0                                  | Reference             |         | Reference             |         |
| N1                                  | 0.83 (0.55-1.24)      | 0.36    | 1.35 (0.88-2.07)      | 0.17    |
| N2                                  | 0.93 (0.65-1.35)      | 0.72    | 1.51 (1.03-2.22)      | 0.04    |
| Primary Treatment Modality          |                       |         |                       |         |
| CCRT                                | Reference             |         | Reference             |         |
| Surgery                             | 0.88 (0.73-1.07)      | 0.19    | 0.95 (0.78-1.14)      | 0.57    |

Abbreviations: CI, confidence interval; NOS, not otherwise specified; CCRT, concurrent chemoradiotherapy

**eFigure.** Landmark Analysis Restricted to Patients Who Survived for More Than 12, More Than 18, and More Than 24 Months

CCRT, concurrent chemoradiotherapy.

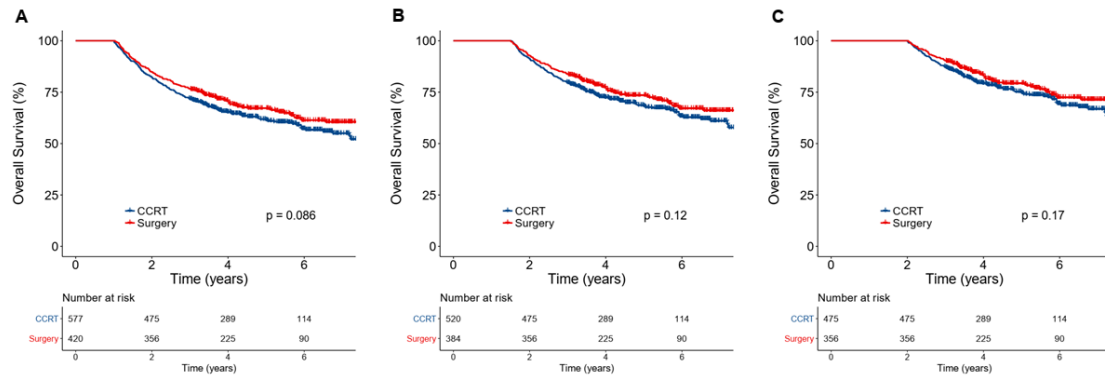

Supplement: jamanetwopen-e2112067-s001.pdf [file jamanetwopen-e2112067-s001.pdf]
